# Supplementary material for: Energetic Polymer Possessing Furazan, 1,2,3-Triazole, and Nitramine Subunits
Source: MDPI journal article supplement (doi:10.3390/ijms24119645), 2023-06-01

## Supporting Information

### Energetic polymer possessing furazan, 1,2,3-triazole and nitramine subunits

Pavel S. Gribov,<sup>1</sup> Natalia N. Kondakova,<sup>2</sup> Natalia N. Il'icheva,<sup>2</sup> Evgenia R. Stepanova,<sup>2</sup> Anatoly P. Denisyuk,<sup>2</sup> Vladimir A. Sizov,<sup>2</sup> Varvara D. Dotsenko,<sup>2</sup> Dmitry B. Vinogradov,<sup>1</sup> Pavel V. Bulatov,<sup>1</sup> Valery P. Sinditskii,<sup>2</sup> Kyrill Yu. Suponitsky,<sup>3,4</sup> Mikhail M. Il'in,<sup>3</sup> Mukhamed L. Keshtov,<sup>3</sup> and Aleksei B. Sheremetev<sup>1,\*</sup>

<sup>1</sup> *Zelinsky Institute of Organic Chemistry, Russian Academy of Sciences, 47 Leninsky prosp., Moscow 119991, Russian Federation*

<sup>2</sup> *Mendeleev University of Chemical Technology, 9 Miusskaya pl., Moscow 125047, Russian Federation*

<sup>3</sup> *Institute of Organoelement Compounds, Russian Academy of Sciences, Moscow 119991, Russian Federation*

<sup>4</sup> *Basic Department of Chemistry of Innovative Materials and Technologies, Plekhanov Russian University of Economics, 36 Stremyanniy Line, Moscow 117997, Russian Federation*

### Table of Contents

|                                        |   |
|----------------------------------------|---|
| X-ray diffraction                      | 2 |
| Quantum chemical calculation           | 2 |
| GPC analysis                           | 5 |
| Decomposition in isothermal conditions | 5 |
| References                             | 6 |
| NMR spectra                            | 7 |

## X-ray diffraction

Single crystal X-ray diffraction experiment was carried out using SMART APEX2 CCD diffractometer ( $\lambda(\text{Mo-K}\alpha) = 0.71073 \text{ \AA}$ , graphite monochromator,  $\omega$ -scans) at 120 K. Collected data were processed by the SAINT and SADABS programs incorporated into the APEX2 program package [73]. The structure was solved by the direct methods and refined by the full-matrix least-squares procedure against  $F^2$  in anisotropic approximation. The refinement was carried out with the SHELXTL program [74]. The CCDC number 2251638 contains the supplementary crystallographic data for this paper. These data can be obtained free of charge via [www.ccdc.cam.ac.uk/data\\_request/cif](http://www.ccdc.cam.ac.uk/data_request/cif)

Crystallographic data for compound **9**:  $\text{C}_{10}\text{H}_{14}\text{N}_4\text{O}_6$  are monoclinic, space group  $P2_1/c$ :  $a = 9.3983(11) \text{ \AA}$ ,  $b = 11.1936(13) \text{ \AA}$ ,  $c = 6.0855(7) \text{ \AA}$ ,  $\beta = 103.411(2)^\circ$ ,  $V = 622.74(13) \text{ \AA}^3$ ,  $Z = 2$ ,  $M = 286.25$ ,  $d_{\text{cryst}} = 1.527 \text{ g}\cdot\text{cm}^{-3}$ .  $wR2 = 0.0823$  calculated on  $F^2_{hkl}$  for all 1652 independent reflections with  $2\theta < 58.0^\circ$ , ( $GOF = 1.079$ ,  $R = 0.0314$  calculated on  $F_{hkl}$  for 1566 reflections with  $I > 2\sigma(I)$ ).

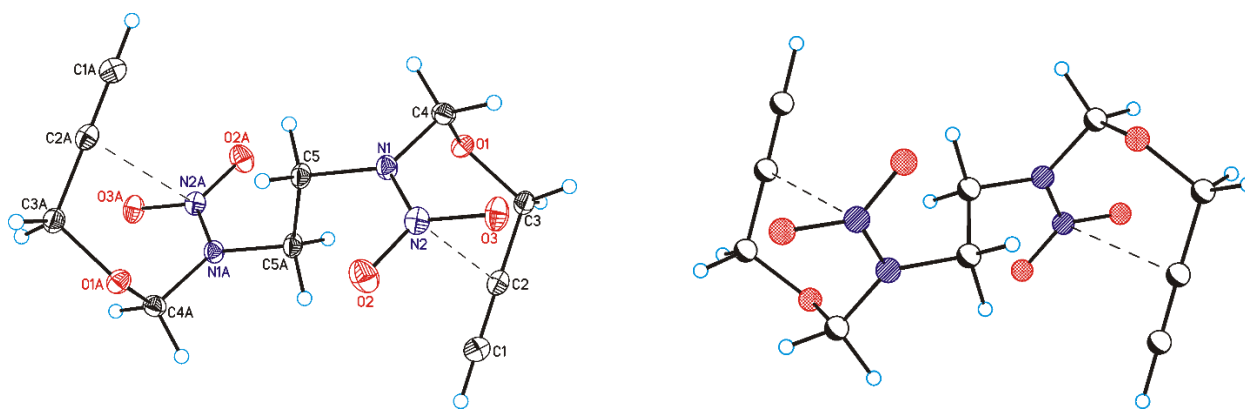

**Figure S1.** General view of compound **9** (Experimental).

## Quantum chemical calculation

Optimization of the geometry of compounds was carried out using the Gaussian program [75] at M052X/def2tzvp level of approximation which was successfully adopted in our earlier calculations [76-78]. Initial geometry was taken from the X-ray data.

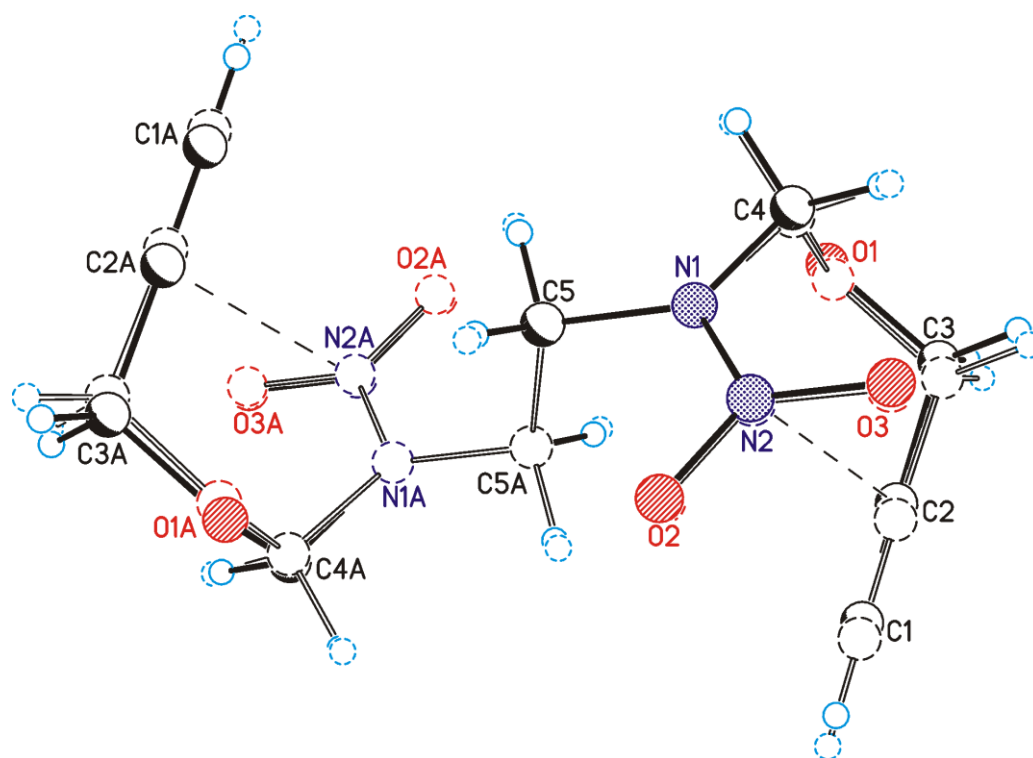

**Figure S2.** Superimposition of calculated geometry onto experimental one for compound **9**.

Experimental bond lengths and angles are provided in Tables 1S and 2S.

**Table S1.** Experimental bond lengths for compound **9**.

| Bond   | Length, Å  |
|--------|------------|
| O1-C4  | 1.4111(11) |
| O1-C3  | 1.4345(10) |
| O2-N2  | 1.2356(10) |
| O3-N2  | 1.2347(10) |
| N1-N2  | 1.3555(11) |
| N1-C4  | 1.4570(11) |
| N1-C5  | 1.4596(11) |
| C1-C2  | 1.1945(14) |
| C1-H1  | 0.95       |
| C2-C3  | 1.4716(12) |
| C3-H3A | 0.99       |
| C3-H3B | 0.99       |
| C4-H4A | 0.99       |
| C4-H4B | 0.99       |
| C5-C5  | 1.5351(17) |
| C5-H5A | 0.99       |
| C5-H5B | 0.99       |

**Table S2.** Experimental bond angles for compound **9**.

| Bond angle | Value, °   |
|------------|------------|
| C4-O1-C3   | 114.40(7)  |
| N2-N1-C4   | 120.04(7)  |
| N2-N1-C5   | 118.20(7)  |
| C4-N1-C5   | 121.44(7)  |
| O3-N2-O2   | 123.96(8)  |
| O3-N2-N1   | 118.42(8)  |
| O2-N2-N1   | 117.62(8)  |
| C2-C1-H1   | 180.0      |
| C1-C2-C3   | 179.31(10) |
| O1-C3-C2   | 113.17(7)  |
| O1-C3-H3A  | 108.9      |
| C2-C3-H3A  | 108.9      |
| O1-C3-H3B  | 108.9      |
| C2-C3-H3B  | 108.9      |
| H3A-C3-H3B | 107.8      |
| O1-C4-N1   | 112.79(7)  |
| O1-C4-H4A  | 109.0      |
| N1-C4-H4A  | 109.0      |
| O1-C4-H4B  | 109.0      |
| N1-C4-H4B  | 109.0      |
| H4A-C4-H4B | 107.8      |
| N1-C5-C5A  | 111.77(9)  |
| N1-C5-H5A  | 109.3      |
| C5A-C5-H5A | 109.3      |
| N1-C5-H5B  | 109.3      |
| C5-C5-H5B  | 109.3      |
| H5A-C5-H5B | 107.9      |

## GPC analysis

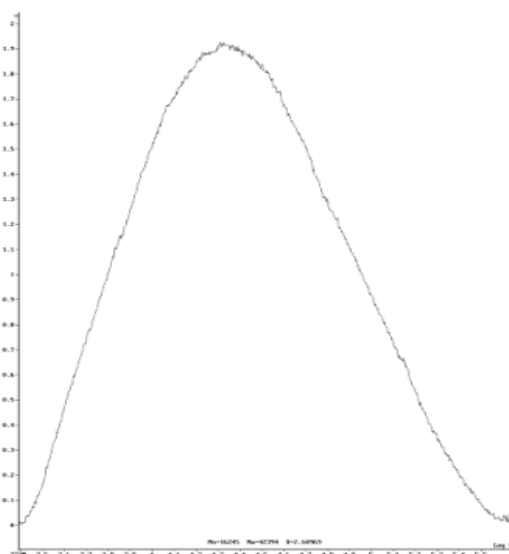

**Figure S3.** GPC analysis of polymer **12**

## Decomposition in isothermal conditions

The experiments on the decomposition of compound **9** under isothermal conditions were carried out in thin-walled glass manometers of the compensation type (the Bourdon glass gauge). Samples of about 20-60 mg weight were loaded into a glass manometer with a volume of 10-12 cm<sup>3</sup>. The ampules were vacuumed to 0.1 Torr, sealed, and put in a thermostat with the Wood's alloy. Pressure of gases evolved in the decomposition experiments (the accuracy of pressure measurements was  $\pm 1$  mm Hg) was converted to the gas volume (V) at normal conditions. Examples of the obtained V vs. time curves are shown in Fig S4.

The description of the experimental dependence of gas release on time V(t) by a suitable model allows one to obtain the rate constants. The rate constant of compound **9** was calculated using the model of first-order reaction with self-acceleration:

$$V = V_{\text{end}} \cdot k_1 (\exp((k_1 + k_2) \cdot t) - 1) / (k_2 + k_1 \cdot \exp((k_1 + k_2) \cdot t)),$$

where  $V_{\text{end}}$  is the final volume of evolved gases,  $k_1$  is rate constant of non-catalytic stage,  $k_2$  is pseudo first-order rate constant of catalytic stage, and  $t$  is time.

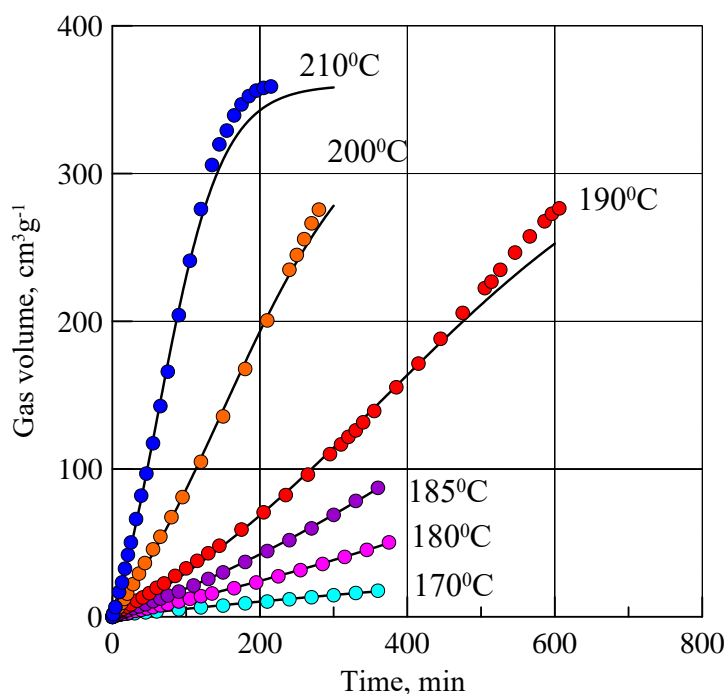

**Figure S4.** Gas release curves of compound **9** at different temperatures. Points are experiment, lines are fittings

## References

73. APEX2 and SAINT; Bruker AXS Inc.: Madison, WI, USA, 2014.
74. Sheldrick, G.M. Crystal structure refinement with SHELXL. *Acta Cryst. C* **2015**, 71, 3-8.  
DOI: 10.1107/S2053229614024218
75. Frisch, M. J.; Trucks, G. W.; Schlegel, H. B.; Scuseria, G. E.; Robb, M. A.; Cheeseman, J. R.; Montgomery, J. A.; Kudin, K. N., Jr.; Burant, J. C.; Millam, J. M.; *et al.* Gaussian 03, Revision E.01, Gaussian, Inc.: Wallingford, **2004**.
76. Suponitsky, K.Yu.; Smol'yakov, A.F.; Ananyev, I.V.; Khakhalev, A.V.; Gidasov, A.A.; Sheremetev, A.B. *ChemistrySelect* **2020**, 5, 14543-14548.
77. Suponitsky, K.Yu.; Fedyanin, I.V.; Karnoukhova, V.A.; Zalomlenkov, V.A.; Gidasov, A.A.; Bakharev, V.V.; Sheremetev, A.B. *Molecules*, **2021**, 26, 7452.
78. Suponitsky, K. Yu.; Masunov, A. E.; Antipin, M. Yu. Conformational dependence of the first molecular hyperpolarizability in the computational design of nonlinear optical materials for optical switching. *Mendeleev. Commun.*, **2008**, 18, 265-267.

# <sup>1</sup>H NMR in DMSO-d6

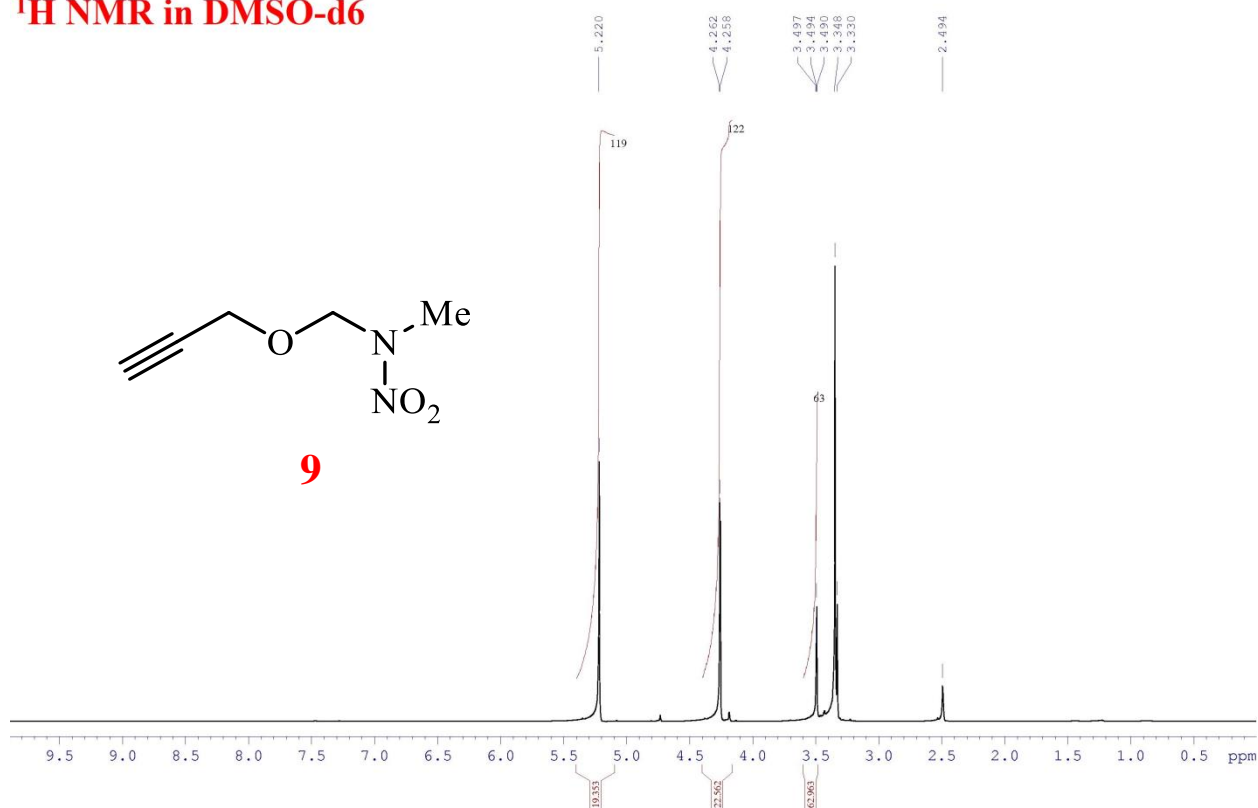

# <sup>13</sup>C NMR in DMSO-d6

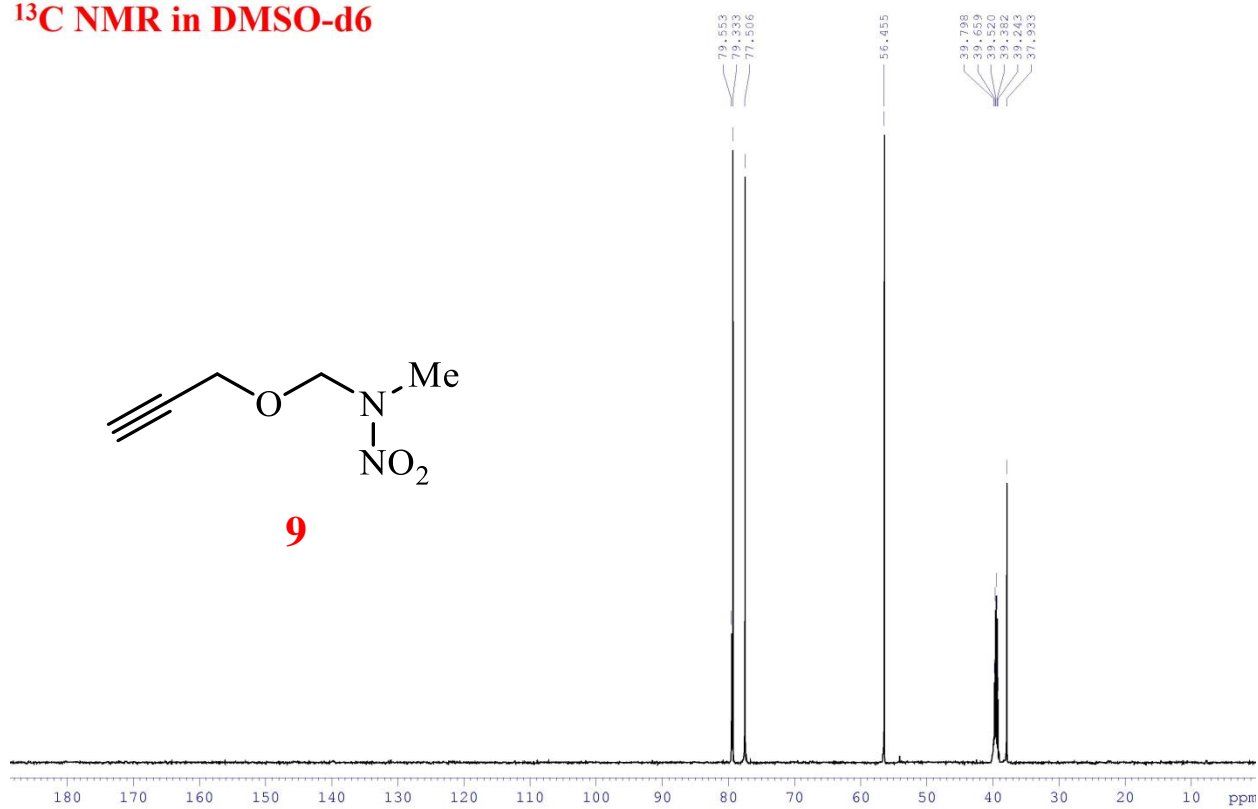

**$^{14}\text{N}$  NMR in DMSO- $d_6$**

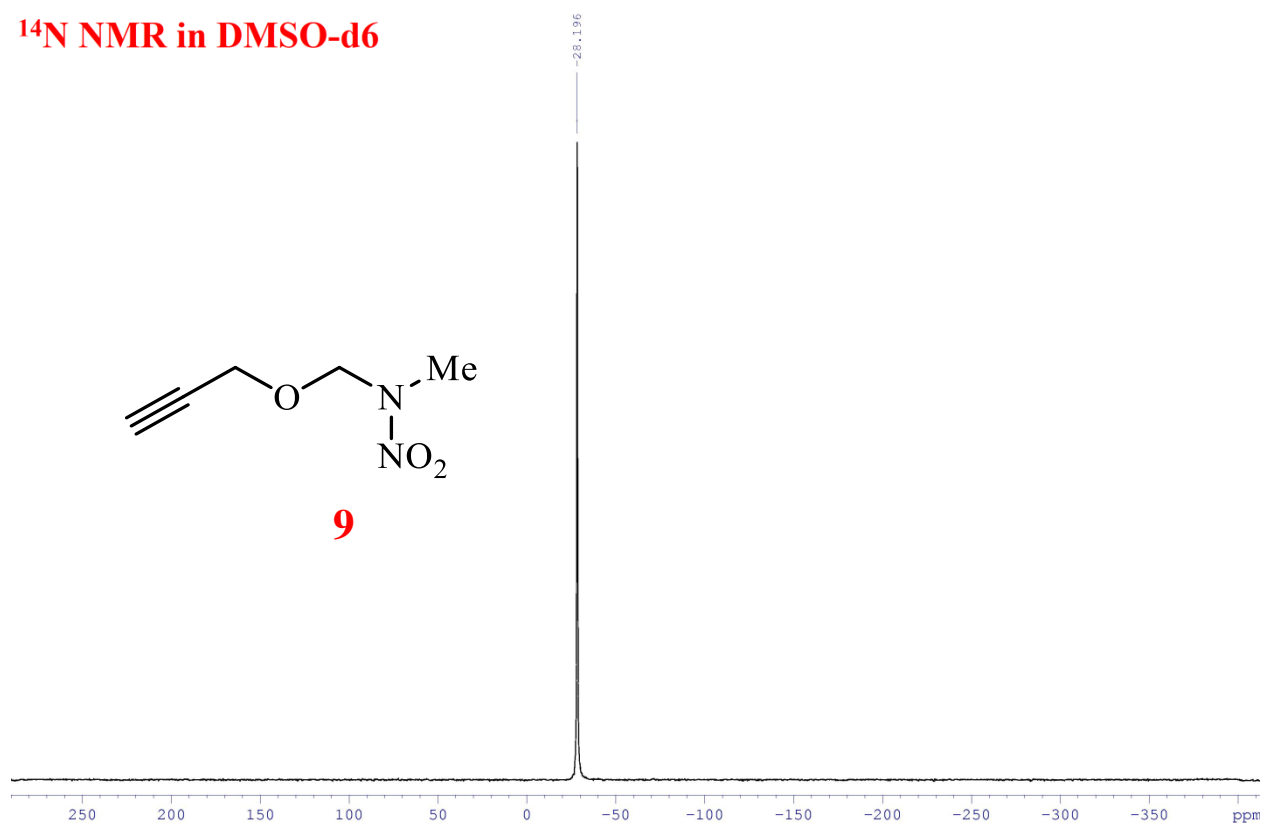

**$^1\text{H}$  NMR in DMSO- $d_6$**

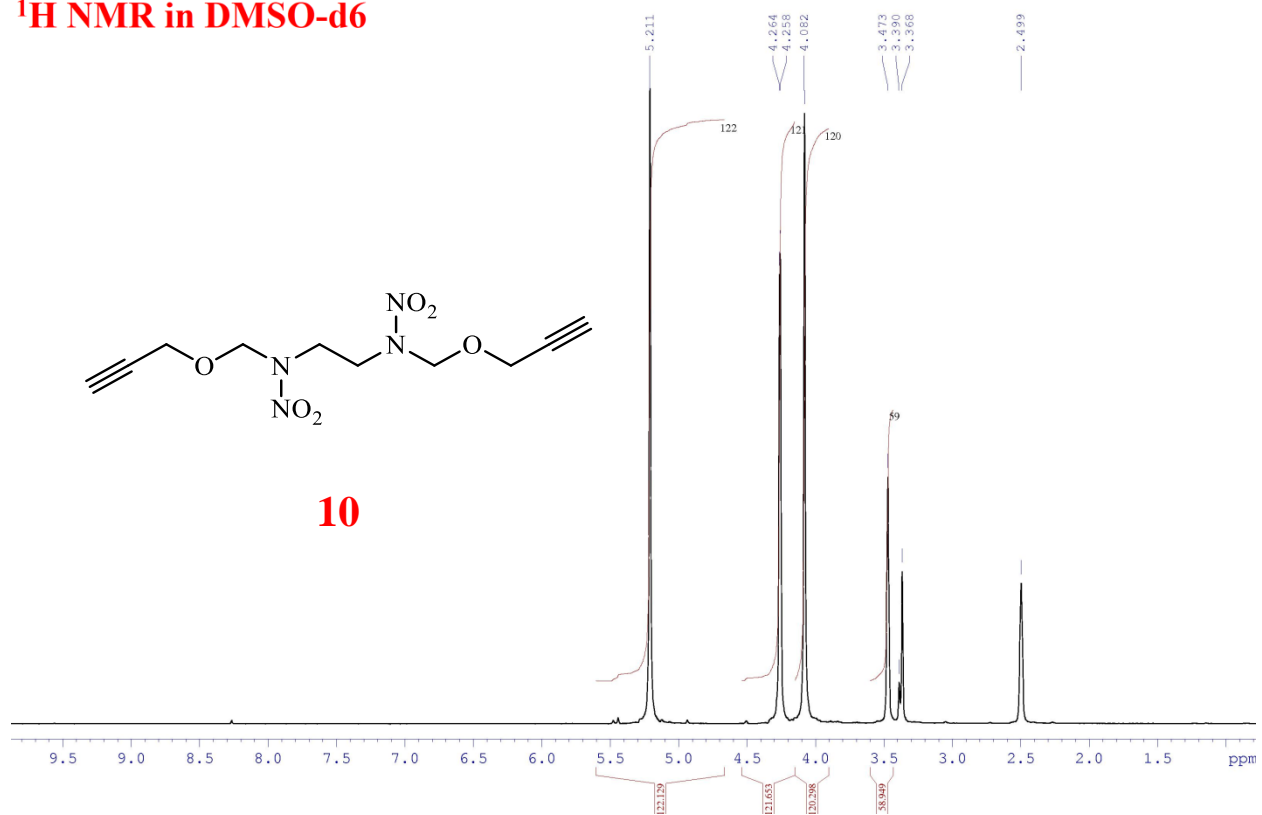



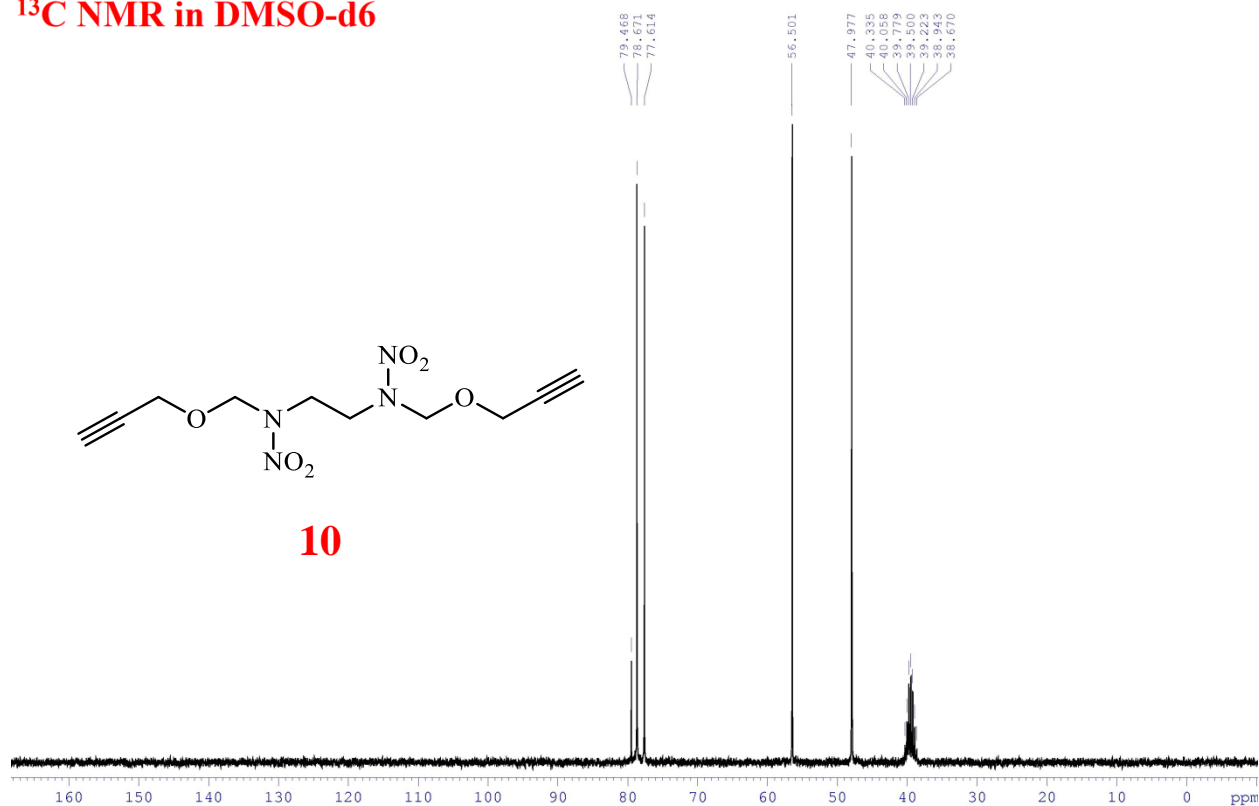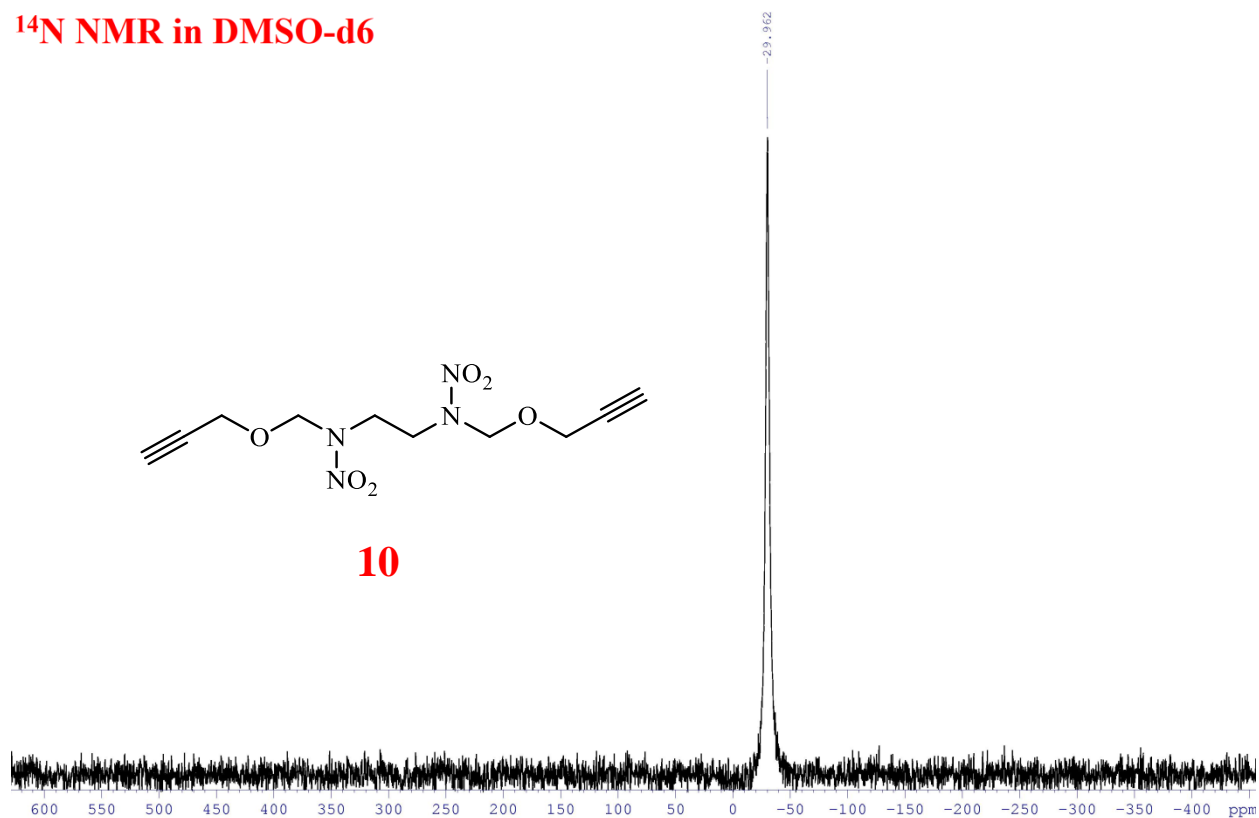

**<sup>1</sup>H NMR in DMSO-d6**

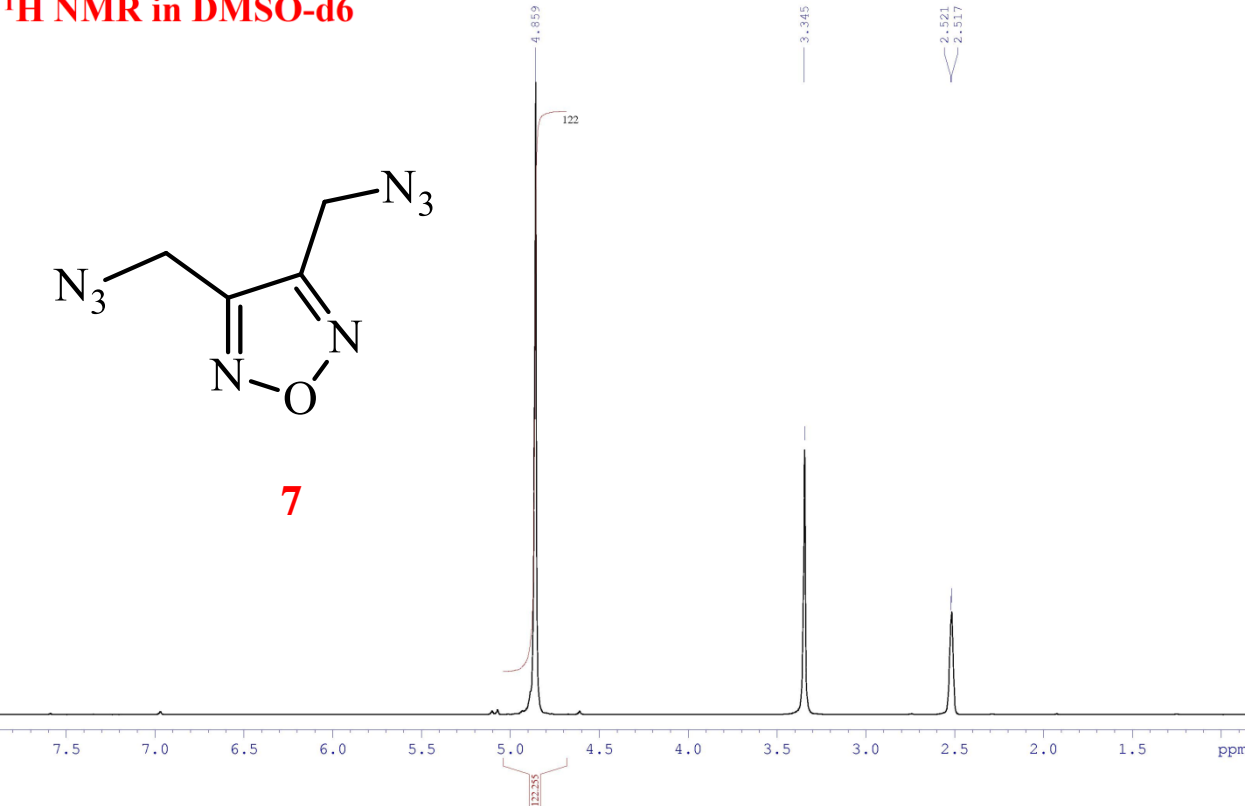

**<sup>13</sup>C NMR in DMSO-d6**

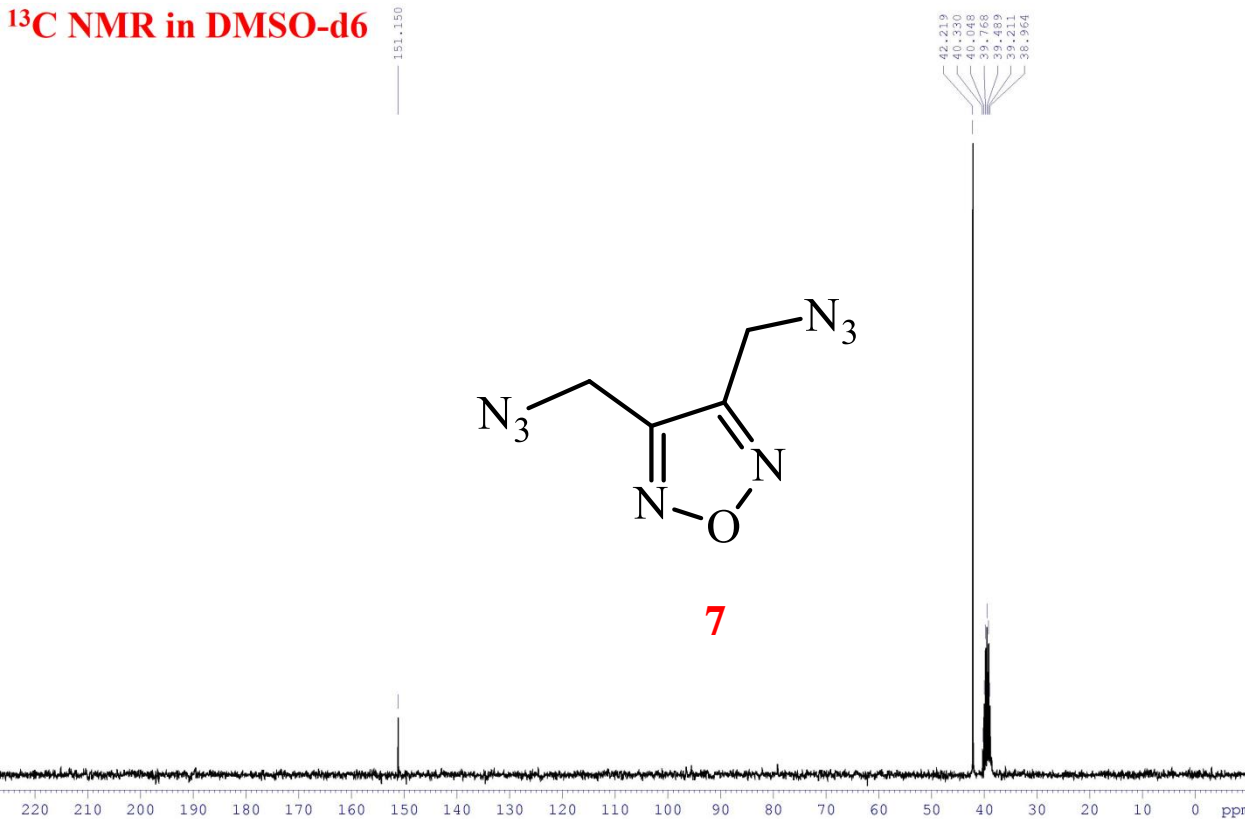

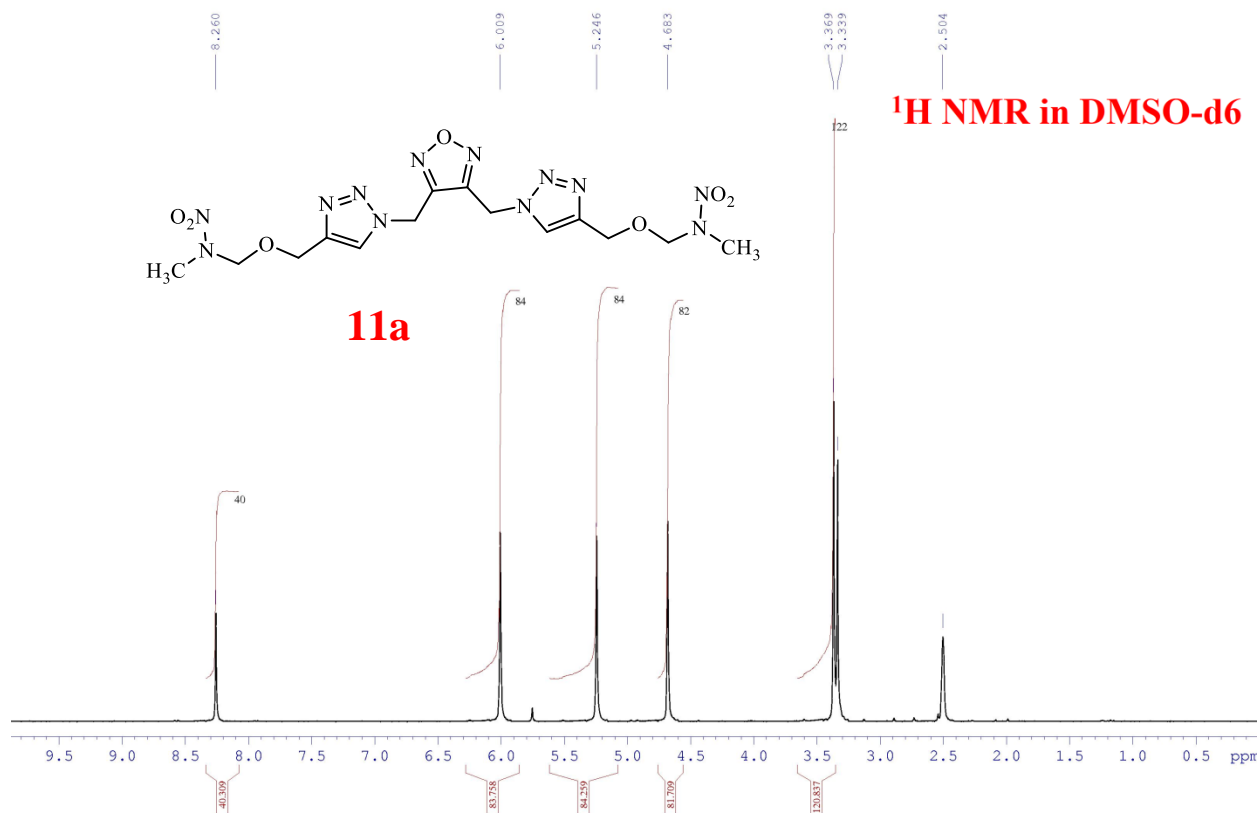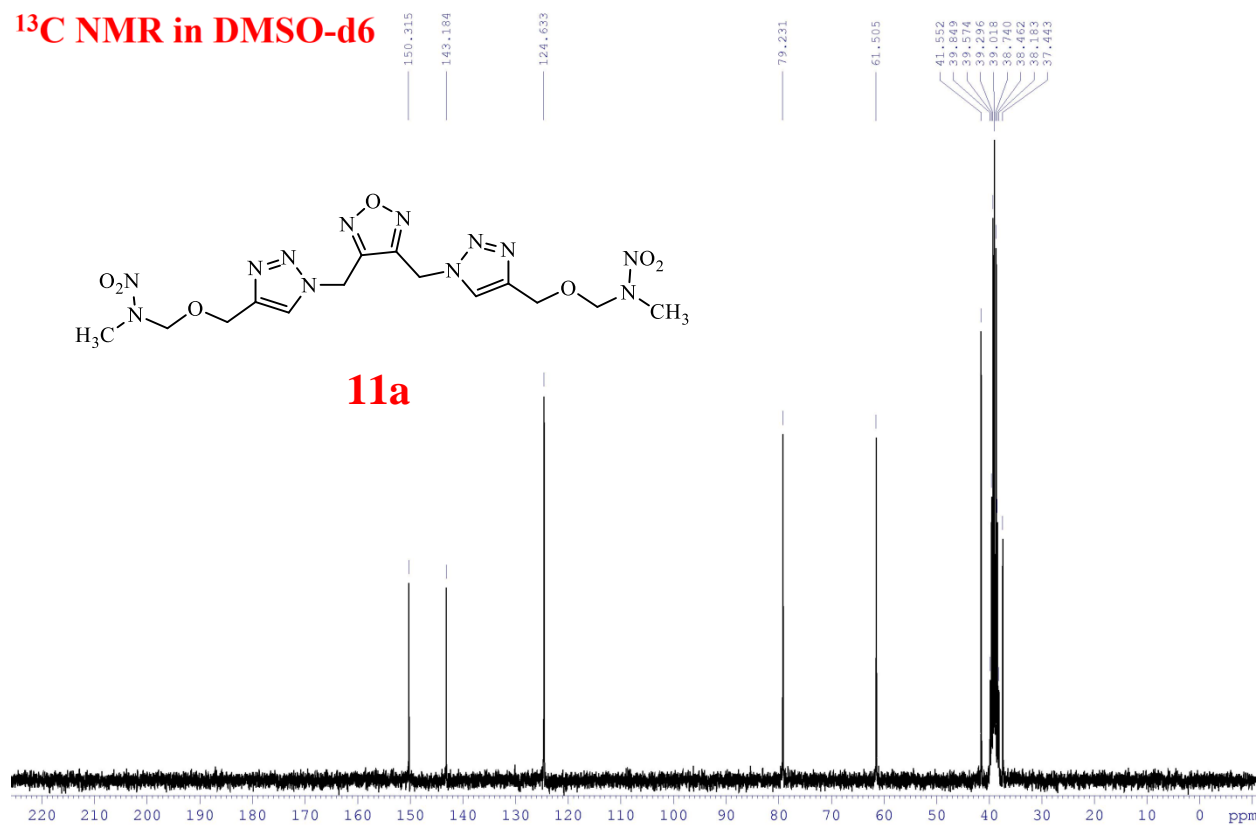

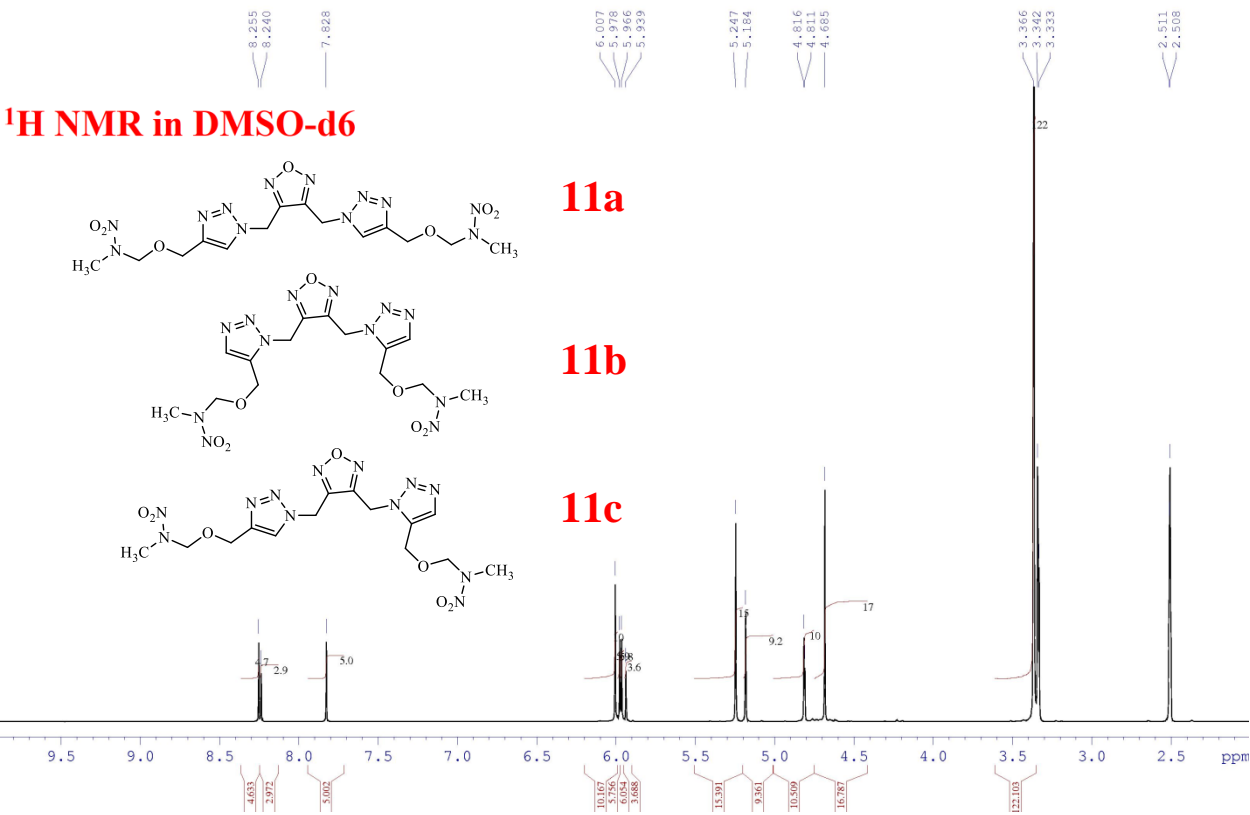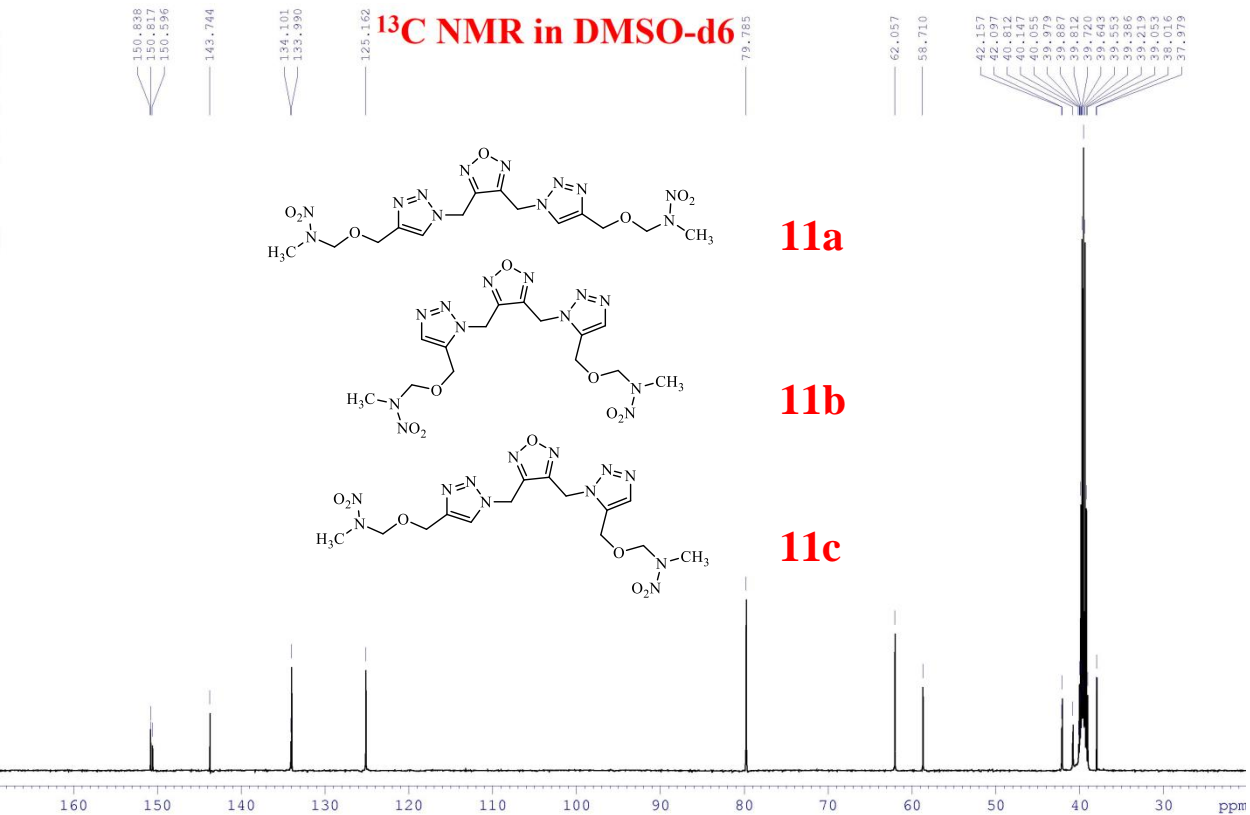

1H-13C HSQC in DMSO-d6

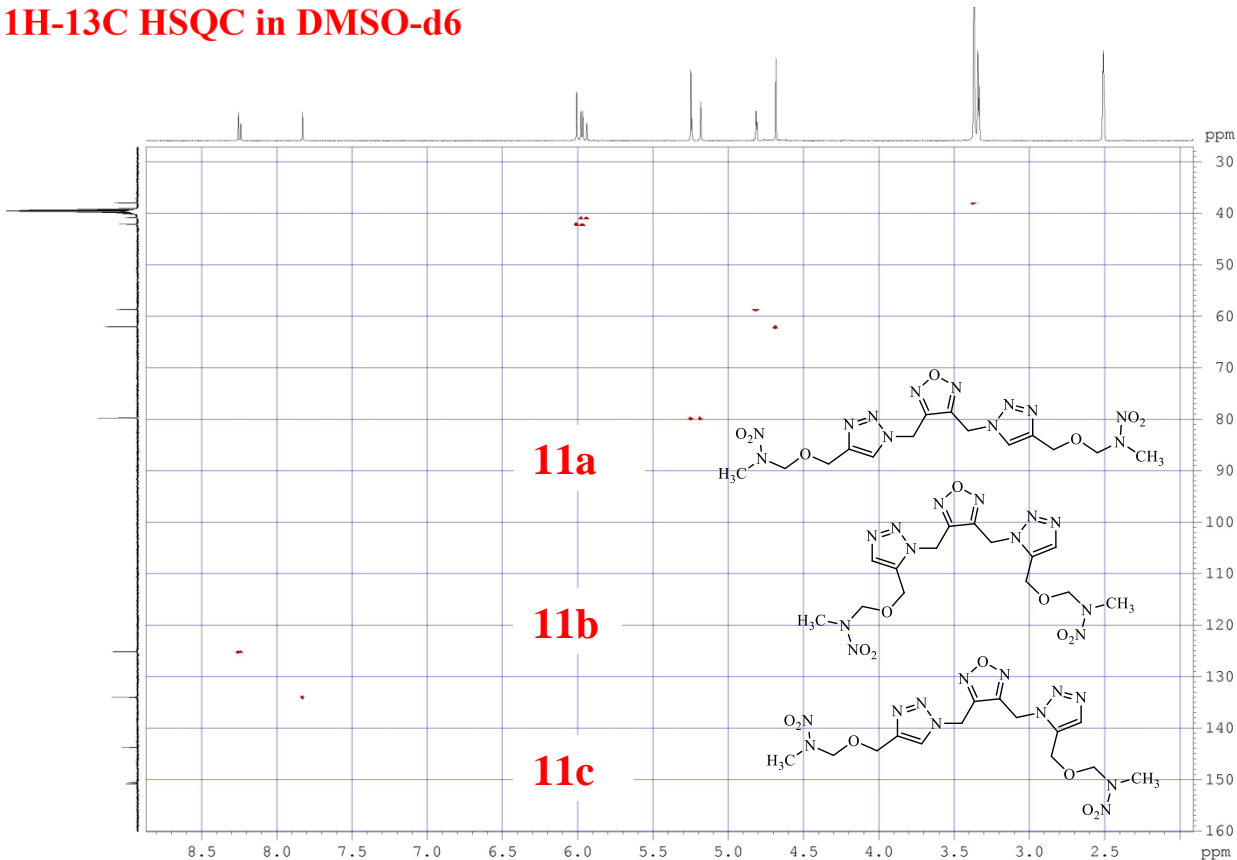

1H NMR in DMSO-d6

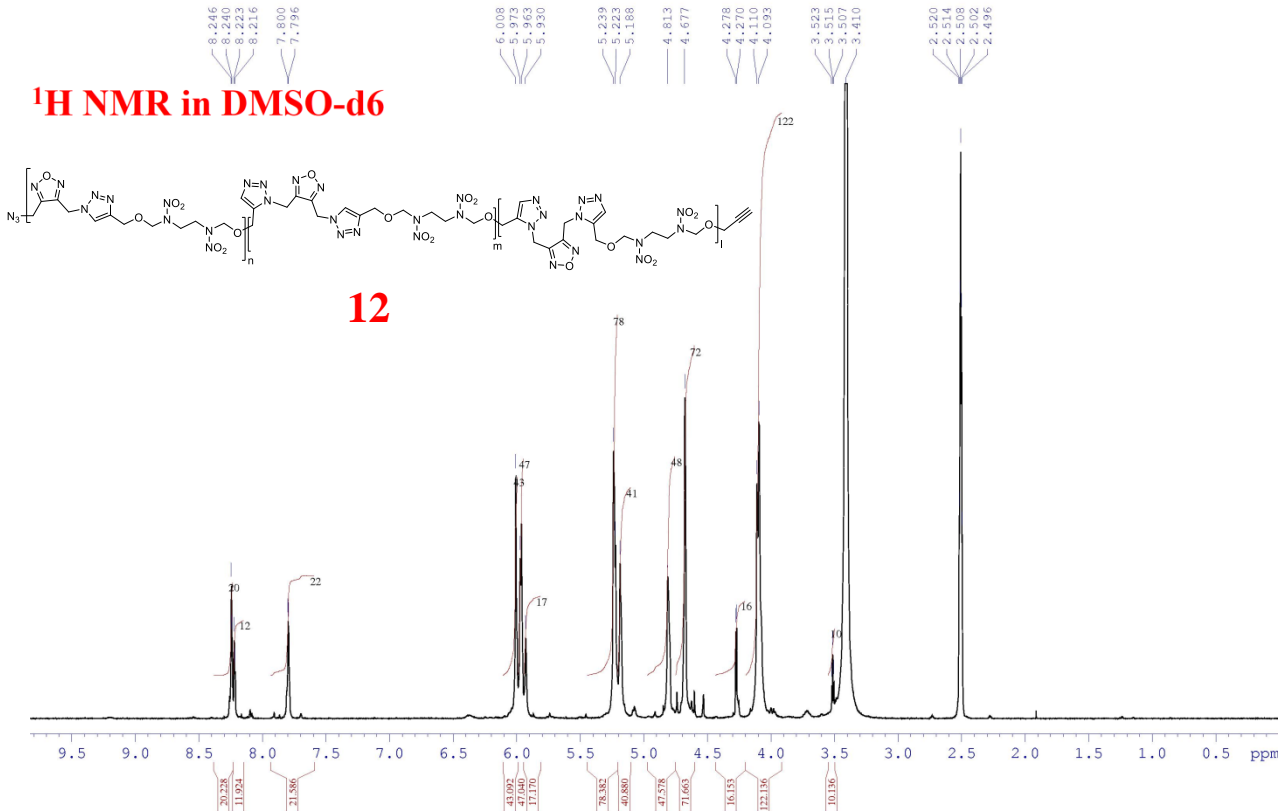

**<sup>13</sup>C NMR in DMSO-d6**

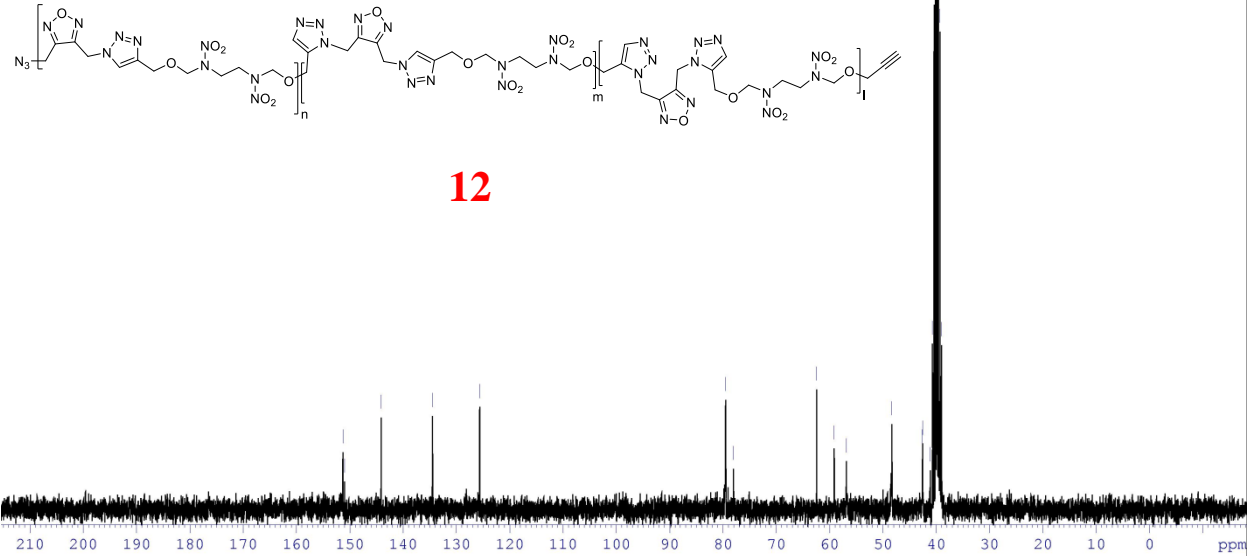

Supplement: s1 [file s1]
